# Supplementary material for: Ni(OH)2-derived lamellar MoS2/Ni3S2/NF with Fe-doped heterojunction catalysts for efficient overall water splitting
Source: Royal Society of Chemistry journal article supplement (doi:10.1039/d3dt02830e), 2023-01-01
Supplement: d3dt02830e1.pdf [file d3dt02830e1.pdf]

***Support information for***  
**Ni(OH)<sub>2</sub>-derived Lamellar MoS<sub>2</sub>/Ni<sub>3</sub>S<sub>2</sub>/NF  
with Fe-doping Hetero-junction  
Catalysts for Efficient Overall Water  
Splitting**

Minghao Dou <sup>a</sup>, Mengjie Yao <sup>a</sup>, Kai Ding <sup>a</sup>, Yuye Cheng <sup>a</sup>, Hongyu Shao <sup>a</sup>,  
Shenjie Li <sup>a\*</sup>, and Yanyan Chen <sup>a\*</sup>

<sup>a</sup> *School of Chemistry and Chemical Engineering, Hefei University of Technology, Hefei,  
Anhui, 230009, PR China.*

\*Corresponding Author Email: [yanyanchen@hfut.edu.cn](mailto:yanyanchen@hfut.edu.cn); [shenjieli@hfut.edu.cn](mailto:shenjieli@hfut.edu.cn)

## Contents

|                                                                                                                                                                                                                                                                                                                                                                                                                                                                                                                                                                                                                                   |     |
|-----------------------------------------------------------------------------------------------------------------------------------------------------------------------------------------------------------------------------------------------------------------------------------------------------------------------------------------------------------------------------------------------------------------------------------------------------------------------------------------------------------------------------------------------------------------------------------------------------------------------------------|-----|
| <b>Figure S1.</b> XRD pattern of Ni(OH) <sub>2</sub> /NF.....                                                                                                                                                                                                                                                                                                                                                                                                                                                                                                                                                                     | S4  |
| <b>Figure S2.</b> SEM images of (a) Ni(OH) <sub>2</sub> /NF, (b) MoS <sub>2</sub> /Ni <sub>3</sub> S <sub>2</sub> , (c) and (d) Fe-MoS <sub>2</sub> /Ni <sub>3</sub> S <sub>2</sub> /NF.....                                                                                                                                                                                                                                                                                                                                                                                                                                      | S5  |
| <b>Figure S3.</b> TEM images (a-c) and HRTEM image (d) of sample MoS <sub>2</sub> /Ni <sub>3</sub> S <sub>2</sub> /NF.....                                                                                                                                                                                                                                                                                                                                                                                                                                                                                                        | S6  |
| <b>Figure S4.</b> Full XPS spectra of sample MoS <sub>2</sub> /Ni <sub>3</sub> S <sub>2</sub> /NF, MoS <sub>2</sub> /Fe-Ni <sub>3</sub> S <sub>2</sub> /NF (a) and Ni(OH) <sub>2</sub> /NF (b). Ni 2p <sub>3/2</sub> (c) and O 1s (d) spectra of sample Ni(OH) <sub>2</sub> /NF.....                                                                                                                                                                                                                                                                                                                                              | S7  |
| <b>Figure S5.</b> SEM images, elemental mapping images and EDS spectrum of sample MoS <sub>2</sub> /Fe-Ni <sub>3</sub> S <sub>2</sub> /NF.....                                                                                                                                                                                                                                                                                                                                                                                                                                                                                    | S8  |
| <b>Figure S6.</b> CV (Cyclic voltammograms) curves of various samples at scan rates ranging from 20 to 100 mV·s <sup>-1</sup> with an interval point of 20 mV·s <sup>-1</sup> in 1.0 M KOH for the determination of the double layer capacitance: (a) bare NF, (b) Ni(OH) <sub>2</sub> /NF, (c) MoS <sub>2</sub> /Ni <sub>3</sub> S <sub>2</sub> /NF, and (d) Fe-MoS <sub>2</sub> /Ni <sub>3</sub> S <sub>2</sub> /NF.....                                                                                                                                                                                                        | S9  |
| <b>Figure S7.</b> Mott-Schottky curves of MoS <sub>2</sub> /Ni <sub>3</sub> S <sub>2</sub> /NF (a) and MoS <sub>2</sub> /Fe-Ni <sub>3</sub> S <sub>2</sub> /NF (b).....                                                                                                                                                                                                                                                                                                                                                                                                                                                           | S10 |
| <b>Figure S8.</b> CV curves of MoS <sub>2</sub> /Ni <sub>3</sub> S <sub>2</sub> /NF and MoS <sub>2</sub> /Fe-Ni <sub>3</sub> S <sub>2</sub> /NF (a), corresponding areas of redox features considered for the calculation of the number of active sites (b), absolute ECSA calculated by dividing the elementary charge of an electron for MoS <sub>2</sub> /Ni <sub>3</sub> S <sub>2</sub> /NF and MoS <sub>2</sub> /Fe-Ni <sub>3</sub> S <sub>2</sub> /NF (c), TOF values at different potentials for MoS <sub>2</sub> /Ni <sub>3</sub> S <sub>2</sub> /NF and MoS <sub>2</sub> /Fe-Ni <sub>3</sub> S <sub>2</sub> /NF (d)..... | S11 |
| <b>Figure S9.</b> Chronopotentiometry responses for OER of MoS <sub>2</sub> /Fe-Ni <sub>3</sub> S <sub>2</sub> /NF for 100 s (a), plots of sampled current densities against potential for OER of MoS <sub>2</sub> /Fe-Ni <sub>3</sub> S <sub>2</sub> /NF and MoS <sub>2</sub> /Ni <sub>3</sub> S <sub>2</sub> /NF (b), the corresponding Tafel plots for OER (c), Chronopotentiometry                                                                                                                                                                                                                                            |     |

responses for HER of MoS<sub>2</sub>/Fe-Ni<sub>3</sub>S<sub>2</sub>/NF for 100 s (d), plots of sampled current densities against potential for HER of MoS<sub>2</sub>/Fe-Ni<sub>3</sub>S<sub>2</sub>/NF and MoS<sub>2</sub>/Ni<sub>3</sub>S<sub>2</sub>/NF (e), the Corresponding Tafel plots for HER (f).……………S14

**Figure S10.** Faradaic efficiency oxygen production measurement of MoS<sub>2</sub>/Fe-Ni<sub>3</sub>S<sub>2</sub>/NF (a), Faradaic efficiency hydrogen production measurement of MoS<sub>2</sub>/Fe-Ni<sub>3</sub>S<sub>2</sub>/NF (b), Faraday efficiency test setup and its hydrogen production stage diagram (c).……………S13

**Figure S11.** XRD pattern of MoS<sub>2</sub>/Fe-Ni<sub>3</sub>S<sub>2</sub>/NF before and after OER durability testing (20 h) (a) and MoS<sub>2</sub>/Fe-Ni<sub>3</sub>S<sub>2</sub>/NF before and after HER durability testing (20 h) (b).……………S14

**Figure S12.** TEM images of MoS<sub>2</sub>/Fe-Ni<sub>3</sub>S<sub>2</sub>/NF (a-c) and MoS<sub>2</sub>/Fe-Ni<sub>3</sub>S<sub>2</sub>/NF (d-f) after OER durability testing .……………S15

**Figure S13.** XPS spectra of Mo 3d (a), Ni 2p (b), S 2p (c), Fe 2p (d) for MoS<sub>2</sub>/Fe-Ni<sub>3</sub>S<sub>2</sub>/NF after OER durability testing (20 h).……………S16

**Figure S14.** XPS spectra of Mo 3d (a), Ni 2p (b), S 2p (c), Fe 2p (d) for MoS<sub>2</sub>/Fe-Ni<sub>3</sub>S<sub>2</sub>/NF after HER durability testing (20 h).……………S17

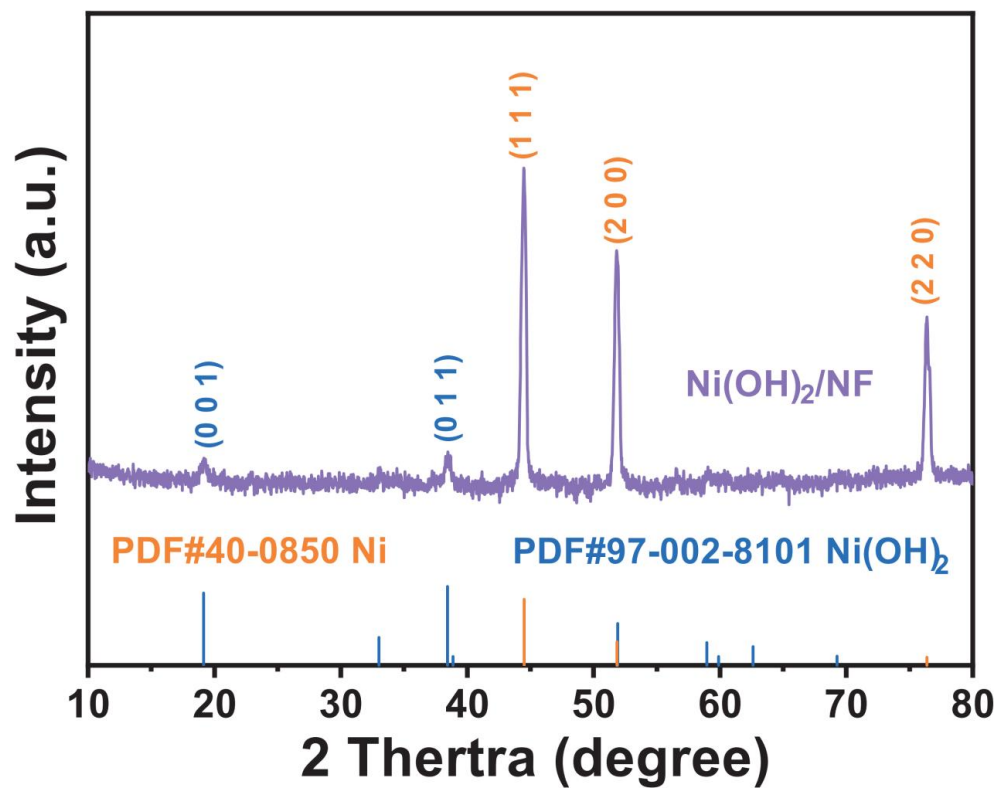

Figure S1. XRD pattern of Ni(OH)<sub>2</sub>/NF.

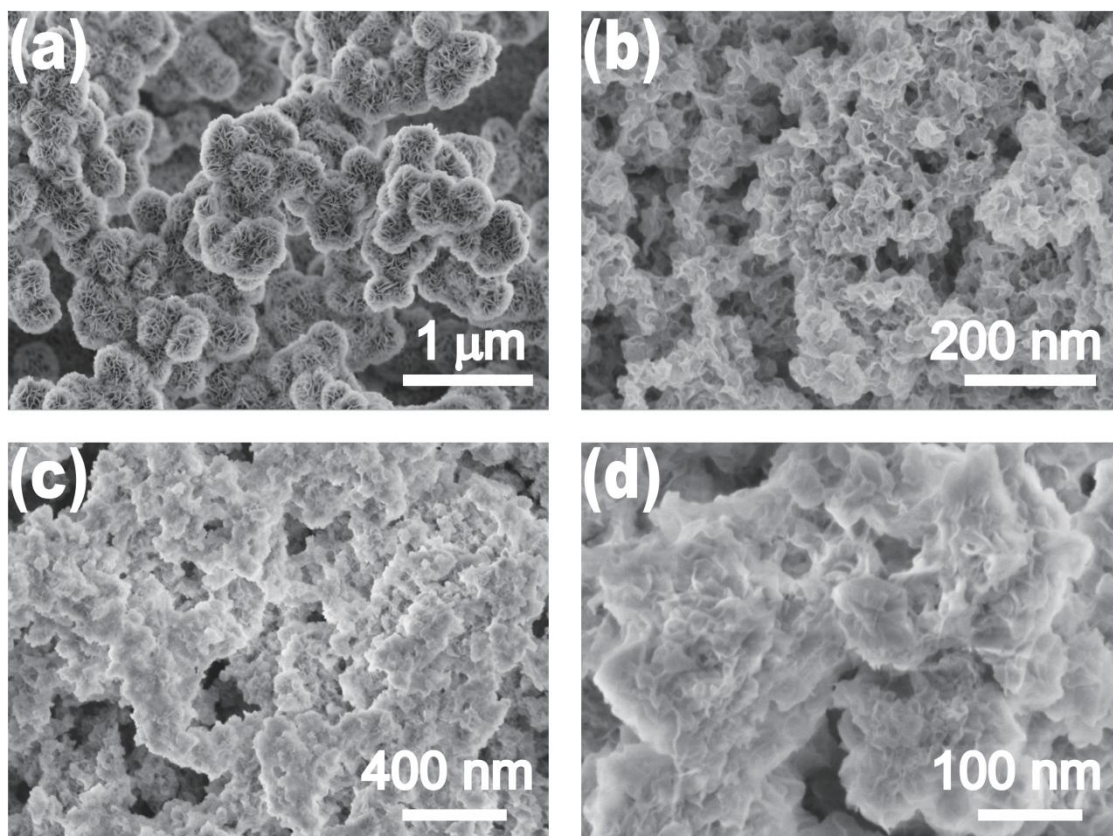

**Figure S2.** SEM images of (a)  $\text{Ni}(\text{OH})_2/\text{NF}$ , (b)  $\text{MoS}_2/\text{Ni}_3\text{S}_2$ , (c) and (d)  $\text{Fe-MoS}_2/\text{Ni}_3\text{S}_2/\text{NF}$ .

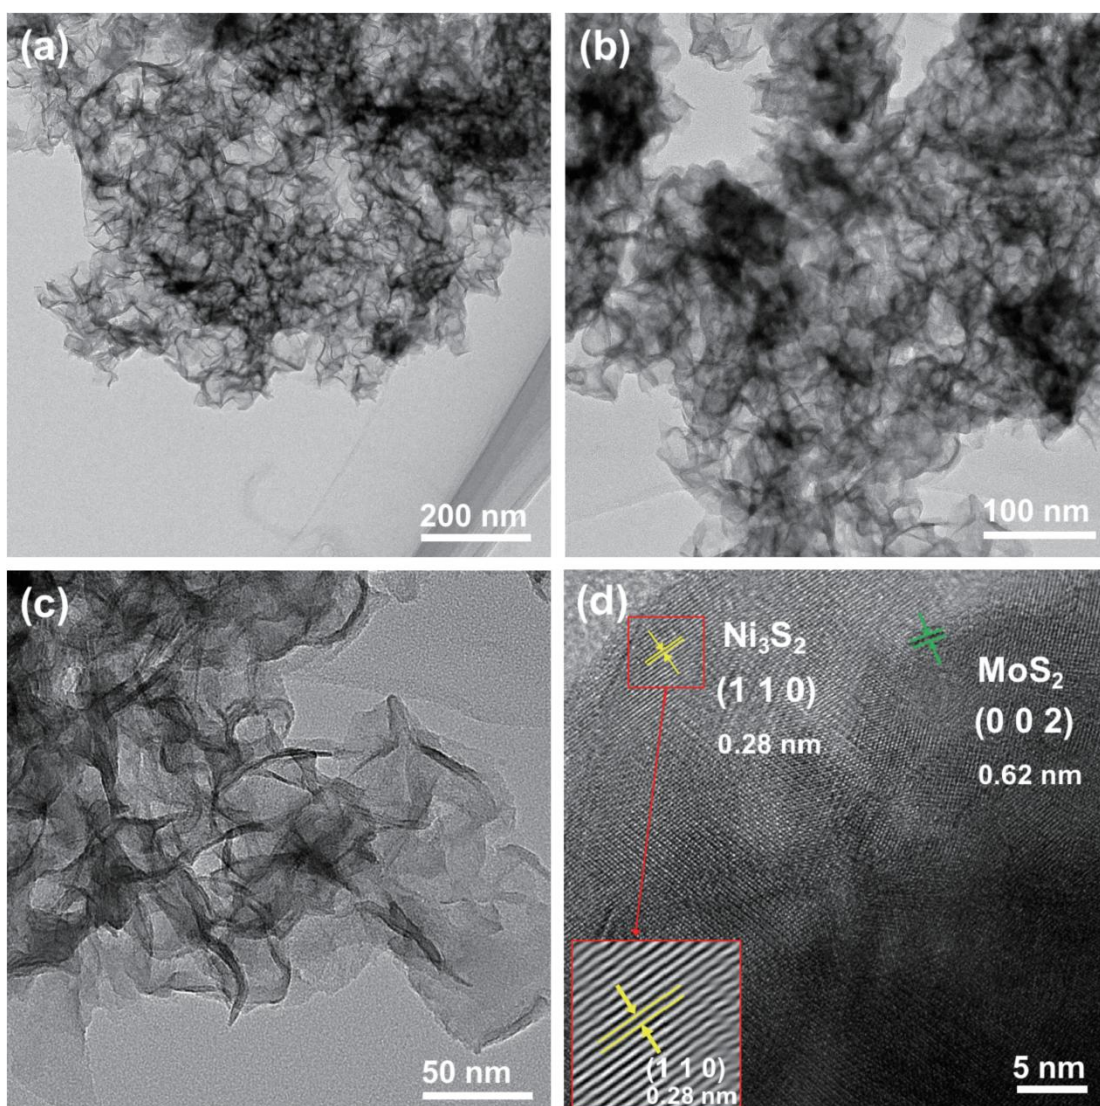

**Figure S3.** TEM images (a-c) and HRTEM image (d) of sample  $\text{MoS}_2/\text{Ni}_3\text{S}_2/\text{NF}$ .

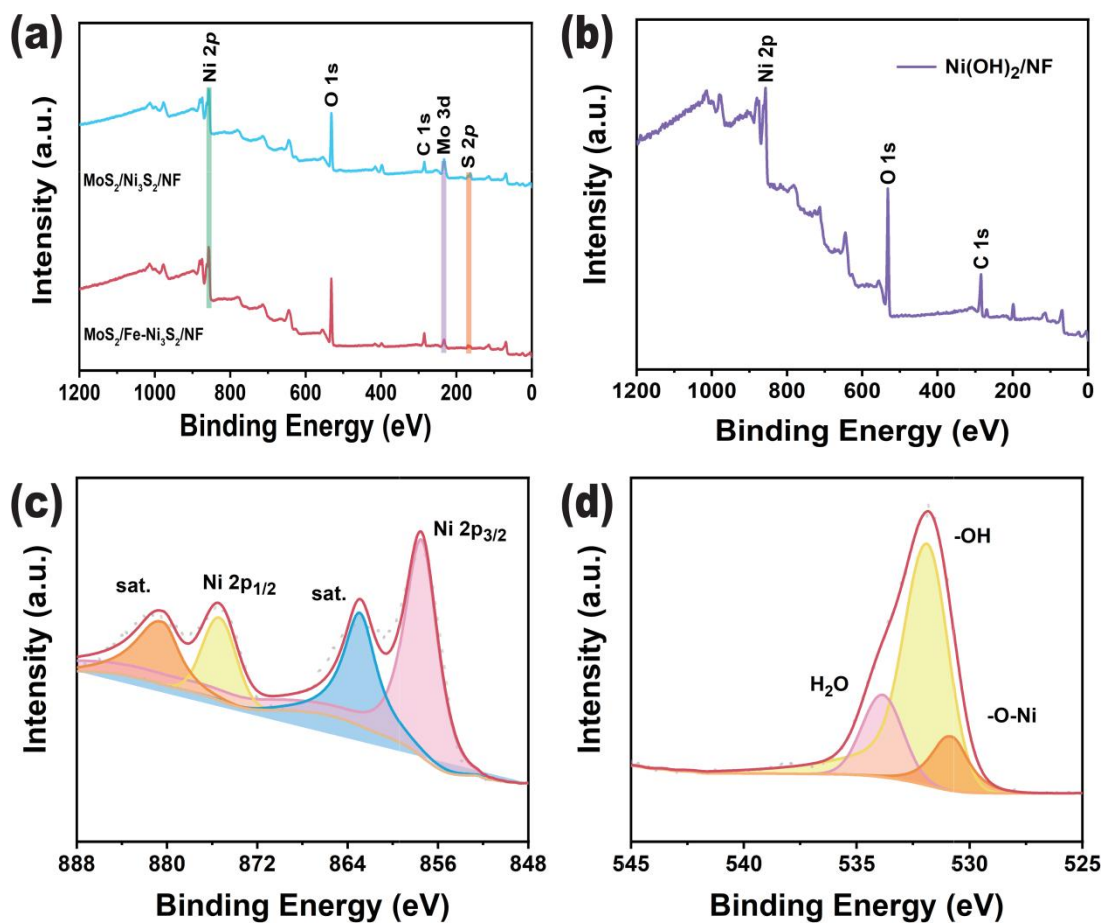

**Figure S4.** Full XPS spectra of sample MoS<sub>2</sub>/Ni<sub>3</sub>S<sub>2</sub>/NF, MoS<sub>2</sub>/Fe-Ni<sub>3</sub>S<sub>2</sub>/NF (a) and Ni(OH)<sub>2</sub>/NF (b) Ni 2p<sub>3/2</sub> (c) and O 1s (d) spectra of sample Ni(OH)<sub>2</sub>/NF.



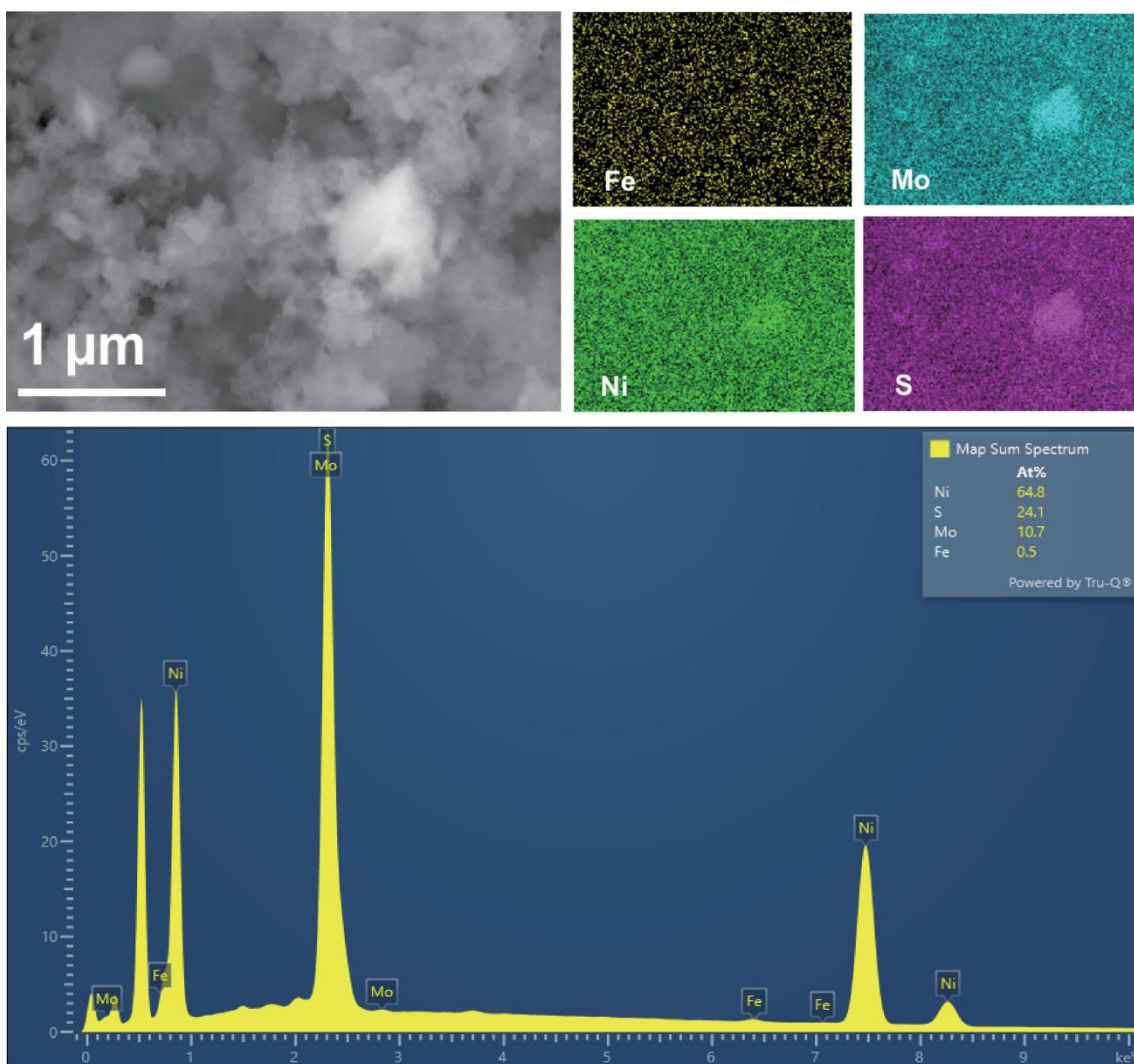

**Figure S5.** SEM images, elemental mapping images and EDS spectrum of sample  $\text{MoS}_2/\text{Fe-Ni}_3\text{S}_2/\text{NF}$ .



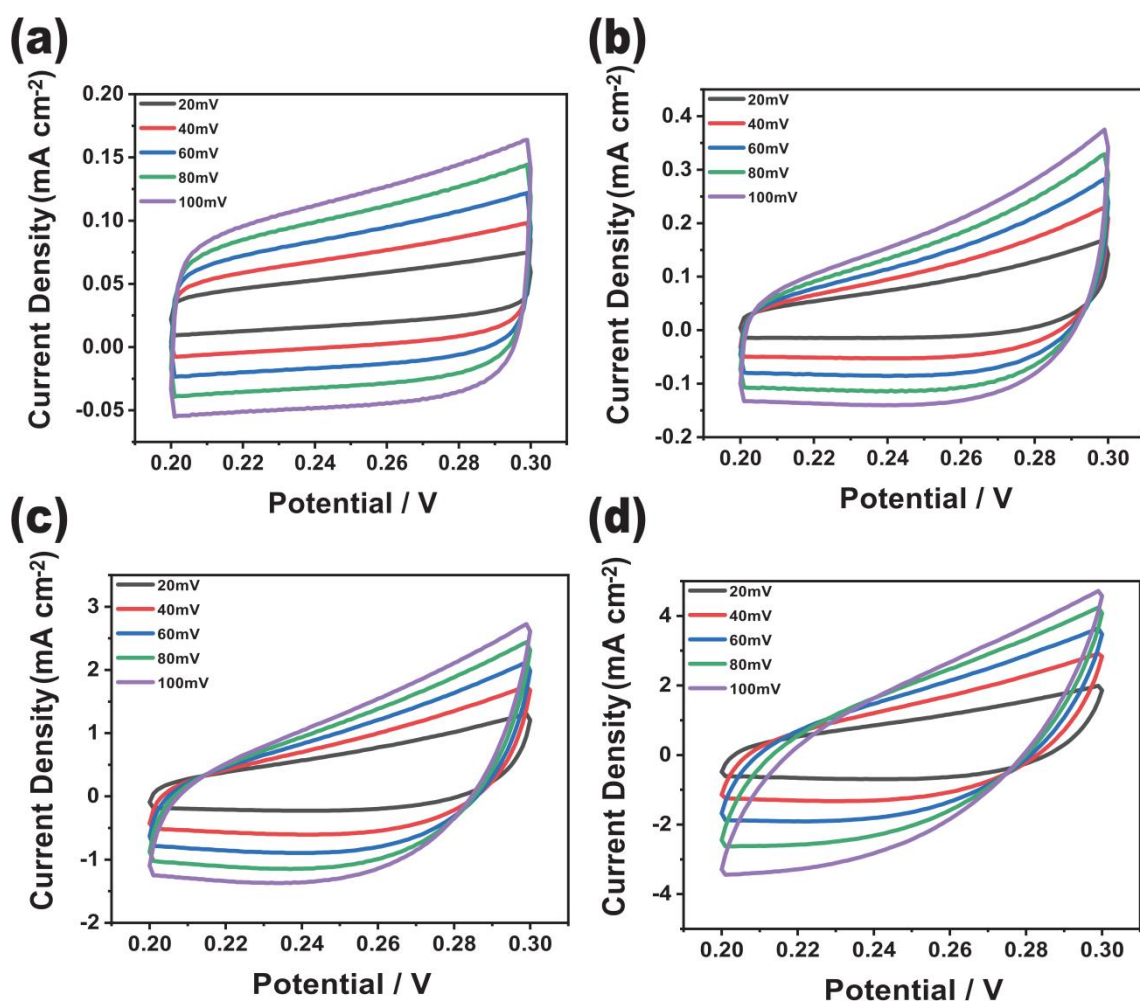

**Figure S6.** CV (Cyclic voltammograms) curves of various samples at scan rates ranging from 20 to 100  $\text{mV}\cdot\text{s}^{-1}$  with an interval point of 20  $\text{mV}\cdot\text{s}^{-1}$  in 1.0 M KOH for the determination of the double layer capacitance: (a) bare NF, (b)  $\text{Ni}(\text{OH})_2/\text{NF}$ , (c)  $\text{MoS}_2/\text{Ni}_3\text{S}_2/\text{NF}$ , and (d)  $\text{MoS}_2/\text{Fe-Ni}_3\text{S}_2/\text{NF}$ .

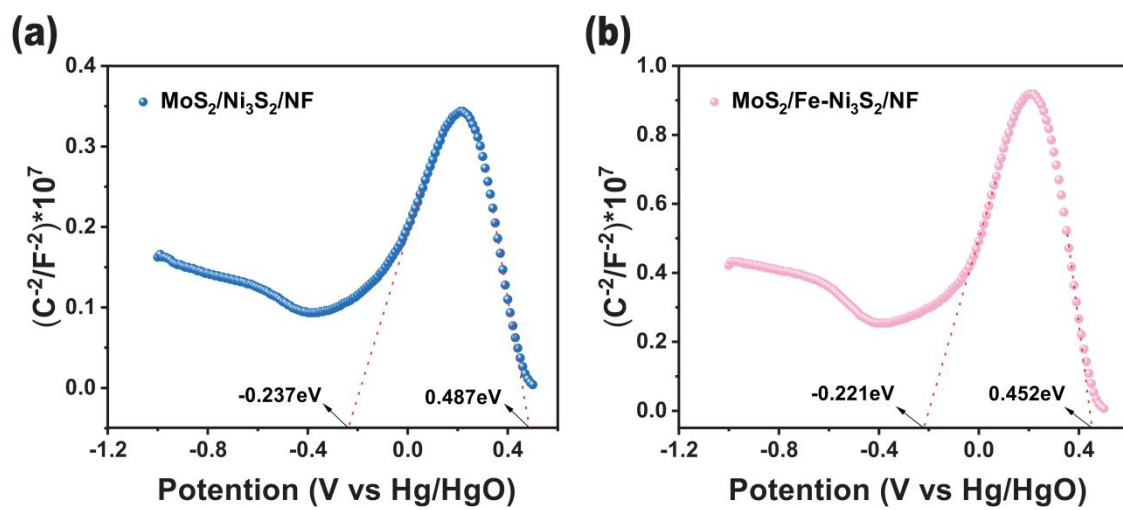

**Figure S7.** Mott-Schottky curves of  $\text{MoS}_2/\text{Ni}_3\text{S}_2/\text{NF}$  (a) and  $\text{MoS}_2/\text{Fe-Ni}_3\text{S}_2/\text{NF}$  (b).

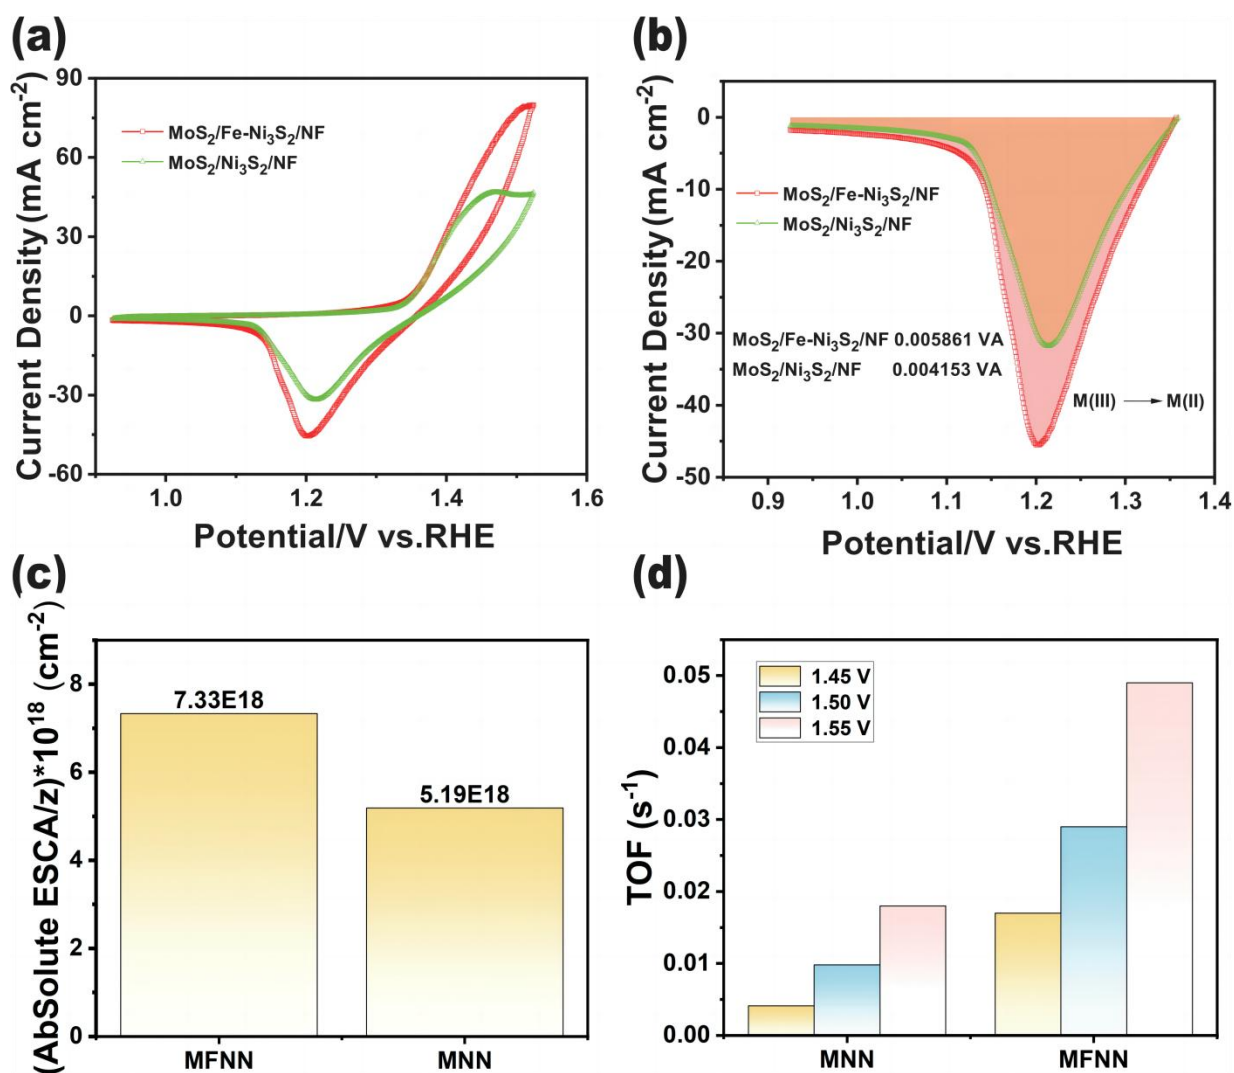

**Figure S8.** CV curves of MoS<sub>2</sub>/Ni<sub>3</sub>S<sub>2</sub>/NF and MoS<sub>2</sub>/Fe-Ni<sub>3</sub>S<sub>2</sub>/NF (a), corresponding areas of redox features considered for the calculation of the number of active sites (b), absolute ECSA calculated by dividing the elementary charge of an electron for MoS<sub>2</sub>/Ni<sub>3</sub>S<sub>2</sub>/NF and MoS<sub>2</sub>/Fe-Ni<sub>3</sub>S<sub>2</sub>/NF (c), TOF values at different potentials for MoS<sub>2</sub>/Ni<sub>3</sub>S<sub>2</sub>/NF and MoS<sub>2</sub>/Fe-Ni<sub>3</sub>S<sub>2</sub>/NF (d).

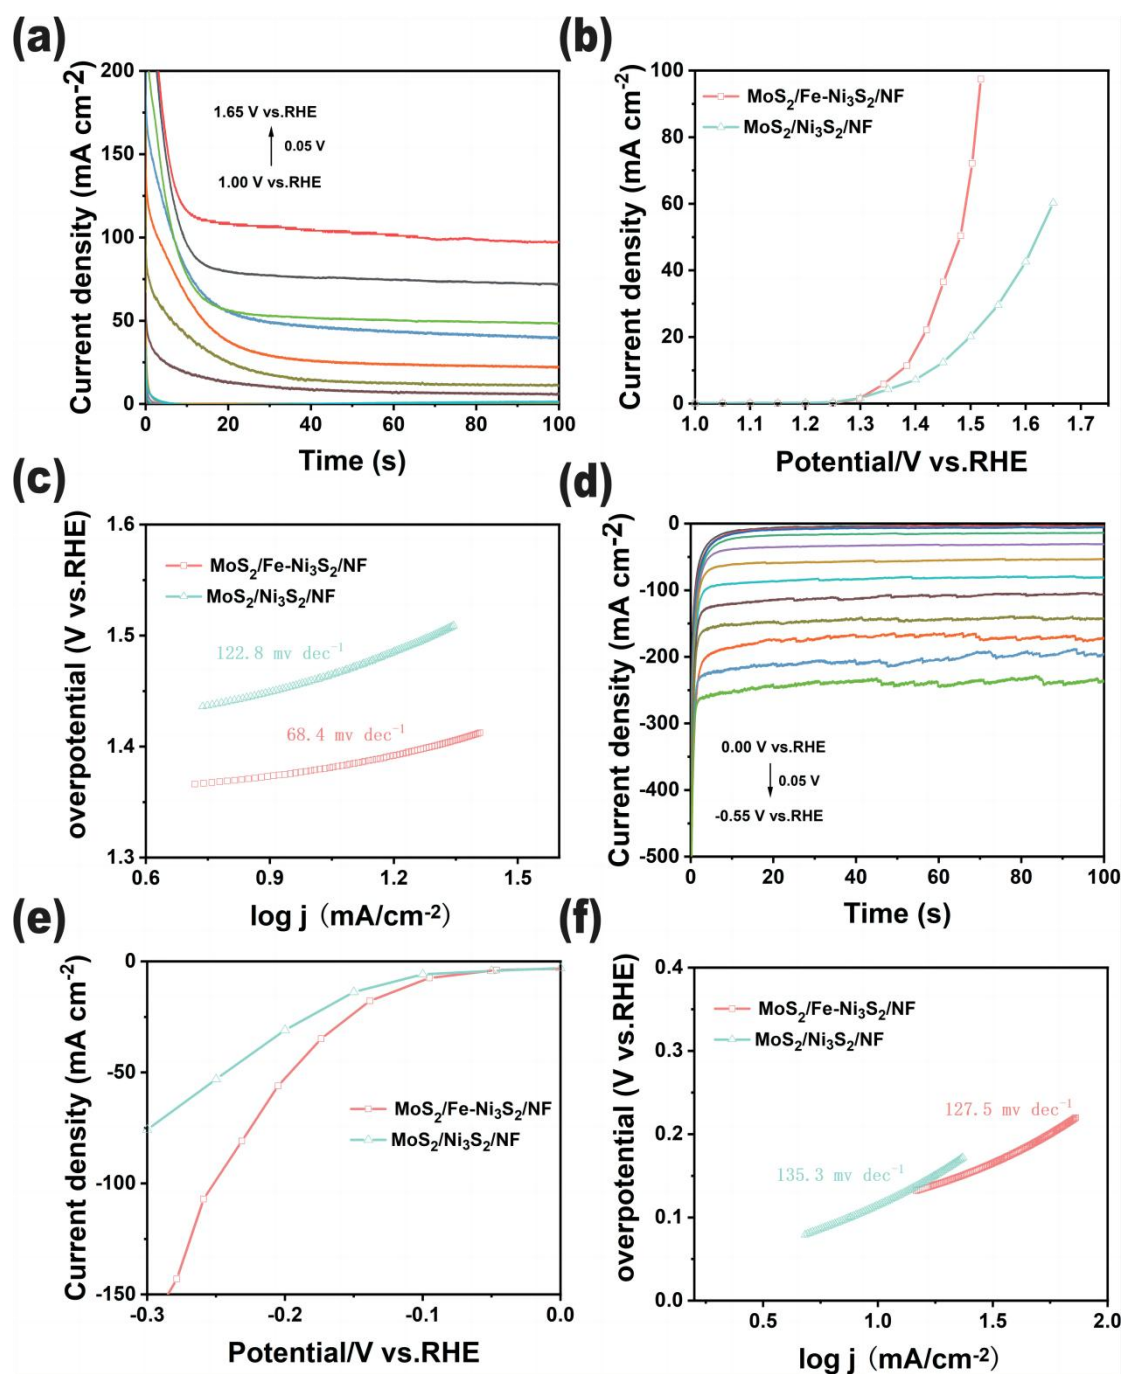

**Figure S9.** Chronopotentiometry responses for OER of MoS<sub>2</sub>/Fe-Ni<sub>3</sub>S<sub>2</sub>/NF for 100 s (a), plots of sampled current densities against potential for OER of MoS<sub>2</sub>/Fe-Ni<sub>3</sub>S<sub>2</sub>/NF and MoS<sub>2</sub>/Ni<sub>3</sub>S<sub>2</sub>/NF (b), the corresponding Tafel plots for OER (c), Chronopotentiometry responses for HER of MoS<sub>2</sub>/Fe-Ni<sub>3</sub>S<sub>2</sub>/NF for 100 s (d), plots of sampled current densities against potential for HER of MoS<sub>2</sub>/Fe-Ni<sub>3</sub>S<sub>2</sub>/NF and MoS<sub>2</sub>/Ni<sub>3</sub>S<sub>2</sub>/NF (e), the Corresponding Tafel plots for HER (f).

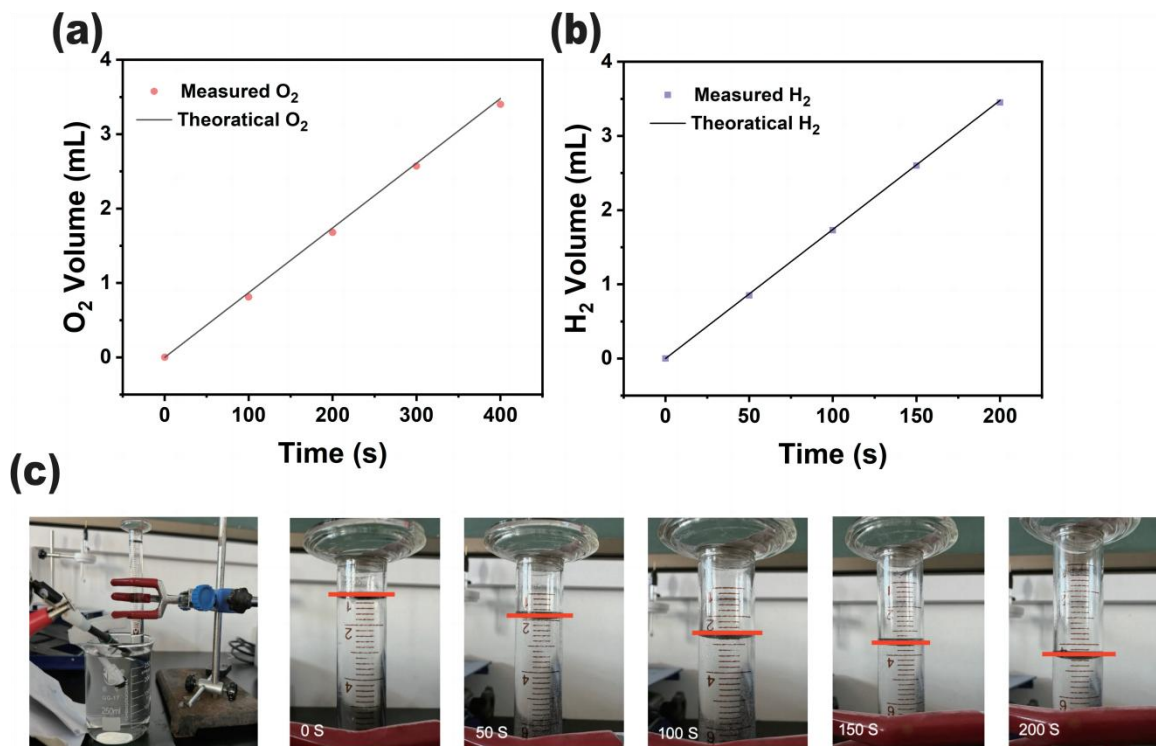

**Figure S10.** Faradaic efficiency oxygen production measurement of MoS<sub>2</sub>/Fe-Ni<sub>3</sub>S<sub>2</sub>/NF (a), Faradaic efficiency hydrogen production measurement of MoS<sub>2</sub>/Fe-Ni<sub>3</sub>S<sub>2</sub>/NF (b), Faraday efficiency test setup and its hydrogen production stage diagram (c).

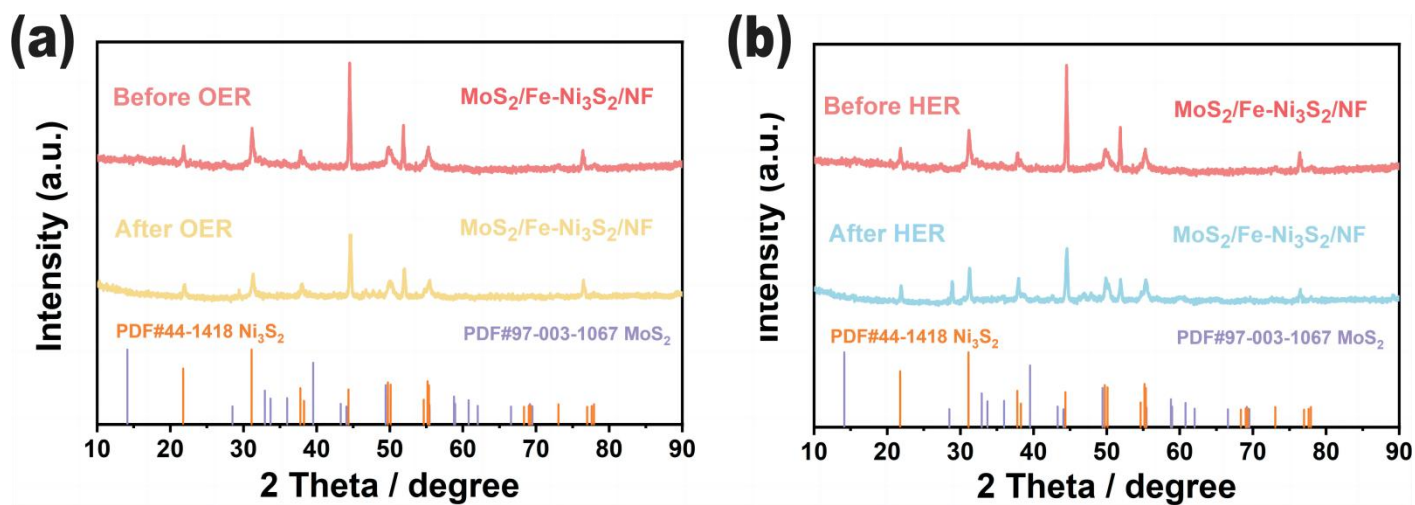

**Figure S11.** XRD patterns of MoS<sub>2</sub>/Fe-Ni<sub>3</sub>S<sub>2</sub>/NF before and after OER durability testing (20 h) (a) and MoS<sub>2</sub>/Fe-Ni<sub>3</sub>S<sub>2</sub>/NF before and after HER durability testing (20h) (b).



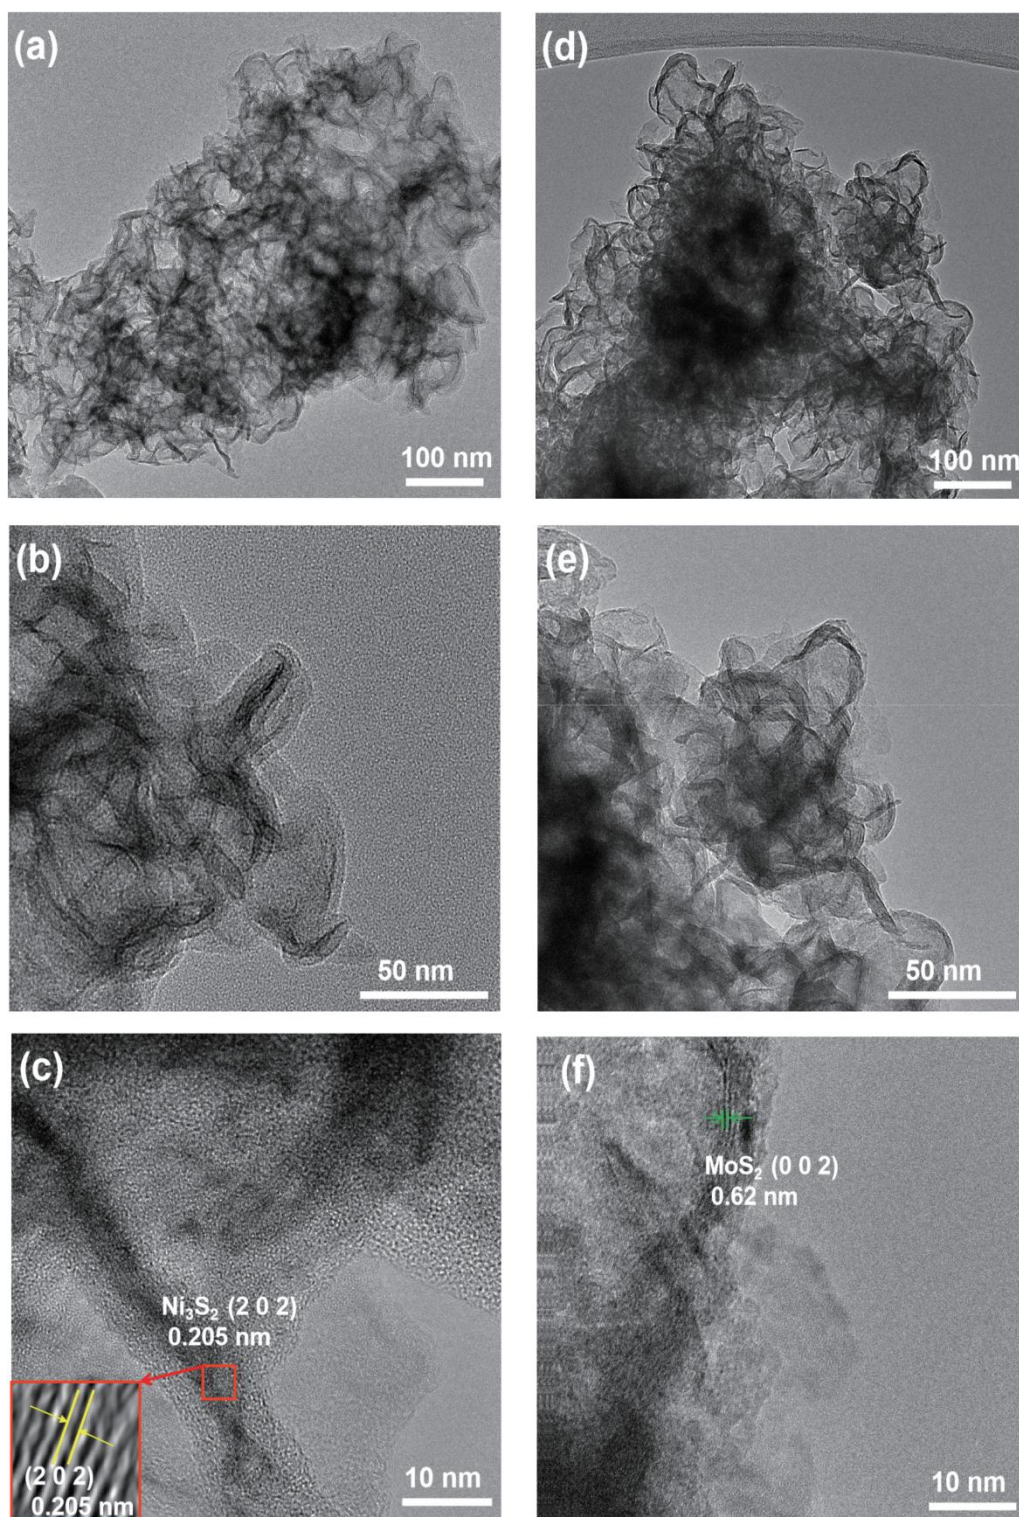

**Figure S12.** TEM images of  $\text{MoS}_2/\text{Fe-Ni}_3\text{S}_2/\text{NF}$  (a-c) and  $\text{MoS}_2/\text{Fe-Ni}_3\text{S}_2/\text{NF}$  (d-f) after OER durability testing.

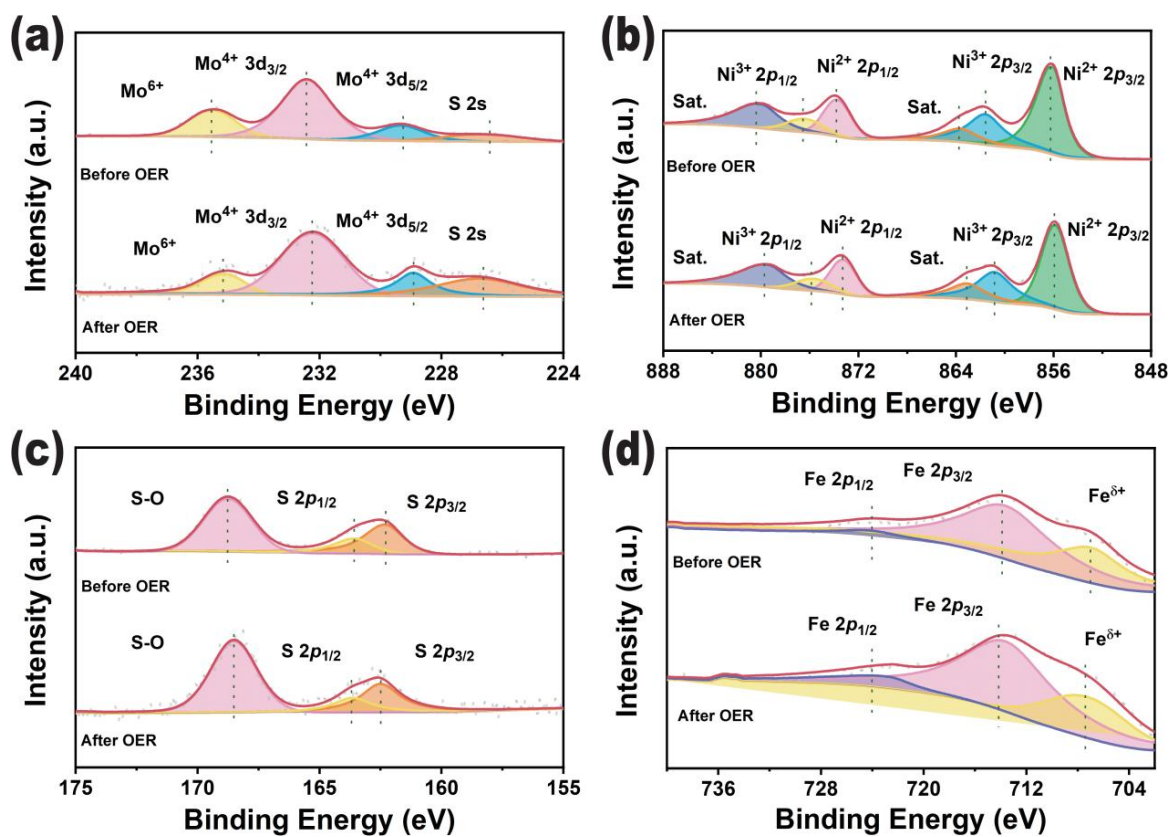

**Figure S13.** XPS spectra of Mo 3d (a), Ni 2p (b), S 2p (c), Fe 2p (d) for MoS<sub>2</sub>/Fe-Ni<sub>3</sub>S<sub>2</sub>/NF after OER durability testing (20 h).

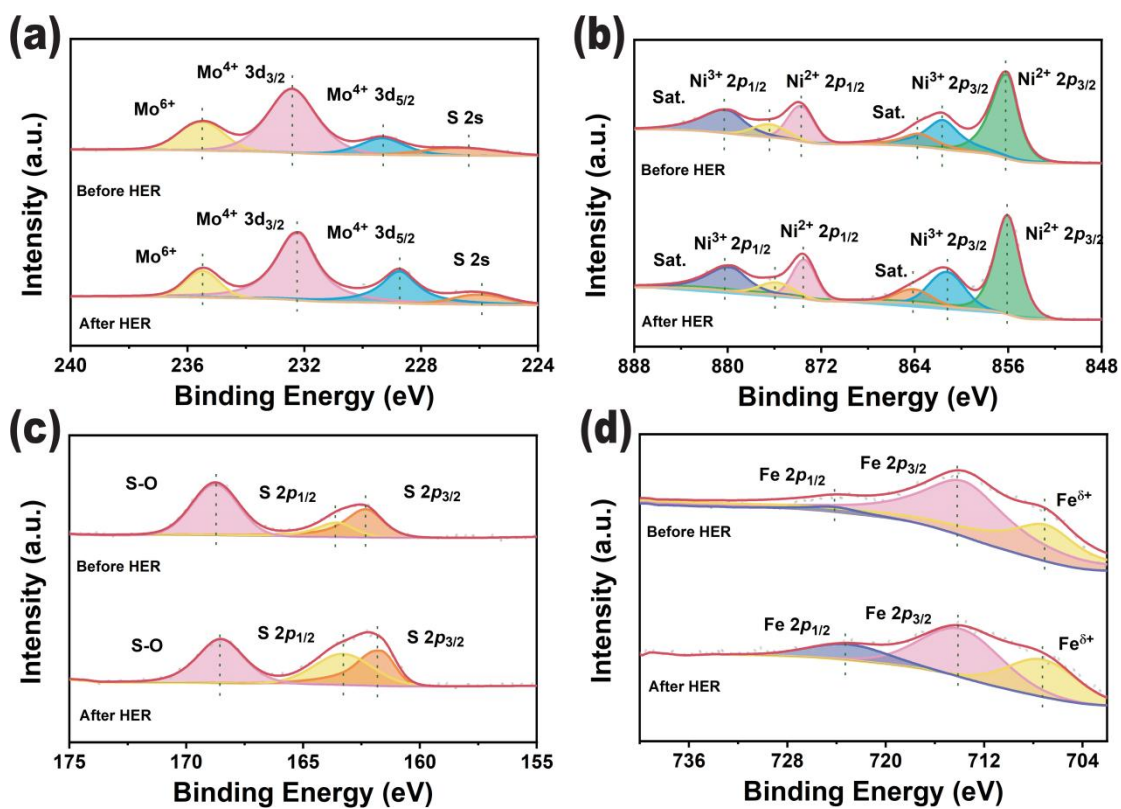

**Figure S14.** XPS spectra of Mo 3d (a), Ni 2p (b), S 2p (c), Fe 2p (d) for MoS<sub>2</sub>/Fe-Ni<sub>3</sub>S<sub>2</sub>/NF after HER durability testing (20 h).
